# Supplementary material for: Anti-Brucella antibodies in seals at coastal locations of Hokkaido, Japan, with focus on life stages
Source: PubMed Central journal article supplement — J Vet Med Sci. 2022 Feb 17;84(4):543–7. doi: 10.1292/jvms.21-0532 (PMC9096050; doi:10.1292/jvms.21-0532), 2022-02-17
Supplement: jvms-84-543-s001.pdf [file jvms-84-543-s001.pdf]

Supplement Table1 Permission number of seal samplings conducted in the present study

| Location <sup>a)</sup> | Species      | Permit issuer                        | Permission number                                                                       |
|------------------------|--------------|--------------------------------------|-----------------------------------------------------------------------------------------|
| Cape Erimo (A)         | Harbor seal  | Japanese Ministry of the Environment | Nos. 21-24-0205, 21-26-0123, 21-26-0022, 21-27-0001, 21-28-0003, 21-29-0165, 21-31-0018 |
|                        | Spotted seal | Hokkaido Government                  | No. 30                                                                                  |
| Nemuro (B)             | Spotted seal | Japanese Ministry of the Environment | Nos. 16-093, 17-015                                                                     |
| Akkeshi (C)            | Harbor seal  | Japanese Ministry of the Environment | No. 12-147, 16-032                                                                      |
|                        | Ribbon seal  | Hokkaido Government                  | No. 433                                                                                 |
|                        | Ringed seal  | Hokkaido Government                  | No. 433                                                                                 |
| Rebun Island (D)       | Spotted seal | Hokkaido Government                  | No. 344                                                                                 |
| Bakkai (E)             | Spotted seal | Hokkaido Government                  | No. 344                                                                                 |
| Soya (F)               | Spotted seal | Hokkaido Government                  | No. 30                                                                                  |
| Teuri Island (G)       | Spotted seal | Japanese Ministry of the Environment | No. 21-28-0065                                                                          |
| Rausu (H)              | Spotted seal | Hokkaido Government                  | No. 92                                                                                  |
| Hidaka (I)             | Ribbon seal  | Hokkaido Government                  | No. 433                                                                                 |

a) Capital letters in parentheses refer to the sampling locations in Fig.1.
